# Supplementary material
Source: PubMed Central journal article supplement (PMC4333439)
Supplement: IAI.02768-14_zii999091099so5.pdf [file IAI.02768-14_zii999091099so5.pdf]

**Supplemental Figure legends:**

**Supplemental Figure 1. Bacterial community membership throughout the GI tract before and after cefoperazone treatment.** The bar plots show the mean percent abundances of the top bacterial families ( $\geq 1\%$  relative abundance). Mice (n=5) were A) Non-antibiotic treated or B) Cefoperazone-treated mice.

**Supplemental Figure 2. Alterations of bile acids before and after cefoperazone treatment throughout the GI tract.** Bile acids were analyzed by LC-MS from murine GI luminal content (proximal, mid and distal small intestine, cecum, colon and stool) (A) Before and (B) After cefoperazone-treatment (n=5 for each group).

**Supplemental Figure 3. Physiologically relevant concentrations of cholate in the distal small intestine after antibiotics were able to support *C. difficile* spore germination *in vitro*.** (A) *In vitro* germination assays were performed to assess the ability of cholate (CA) and taurochenodeoxycholate (TCDCA) to trigger *C. difficile* spore germination. A negative control (PBS alone) showed no germination. Data presented represent mean  $\pm$  SD of triplicate experiments and were significant by non-parametric Kruskal-Wallis one-way analysis of variance test followed by Dunn's Multiple Comparison Test.
