# Supplementary material
Source: PubMed Central journal article supplement (PMC4333439)

**A** Non-Antibiotic Treated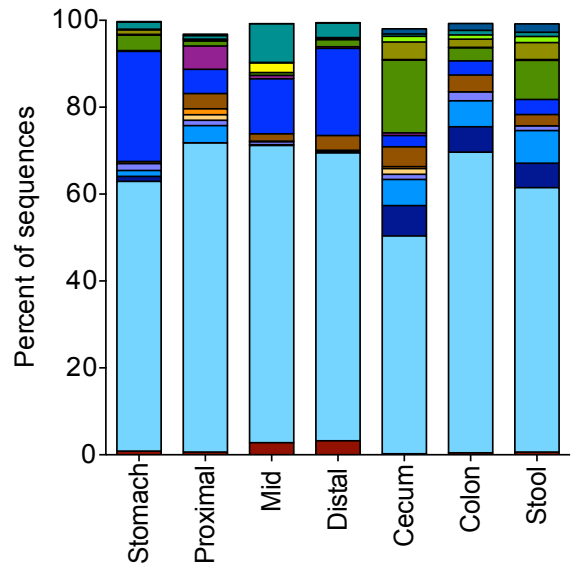**B** Cefoperazone Treated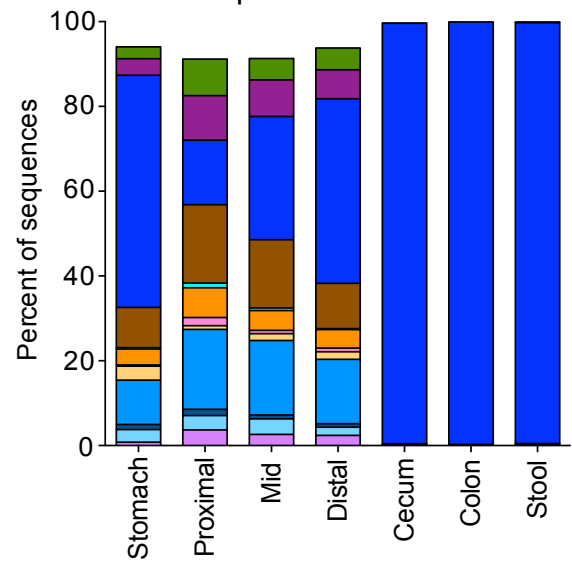

Supplement: IAI.02768-14_zii999091099so2.pdf [file IAI.02768-14_zii999091099so2.pdf]

**A**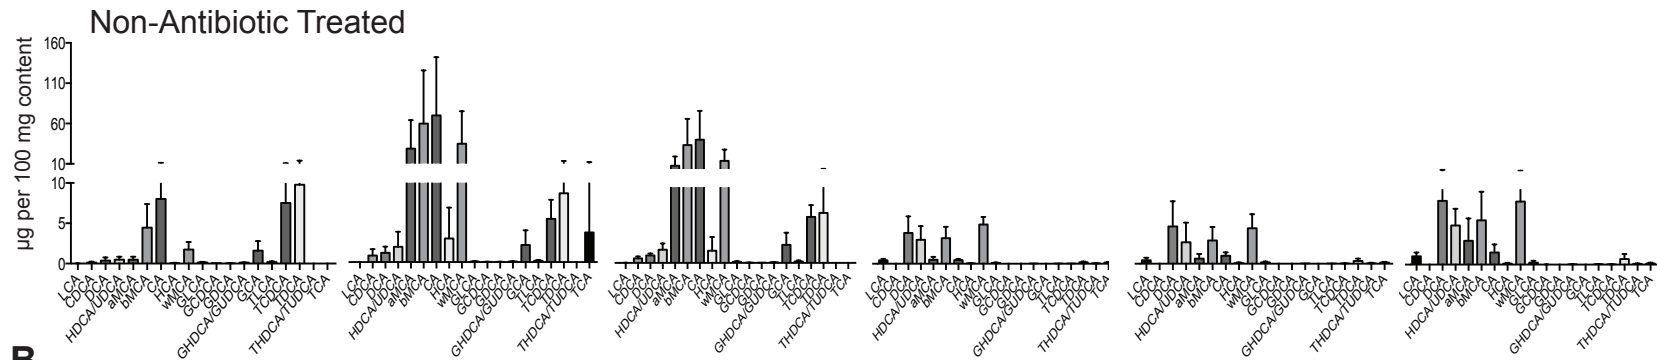**B**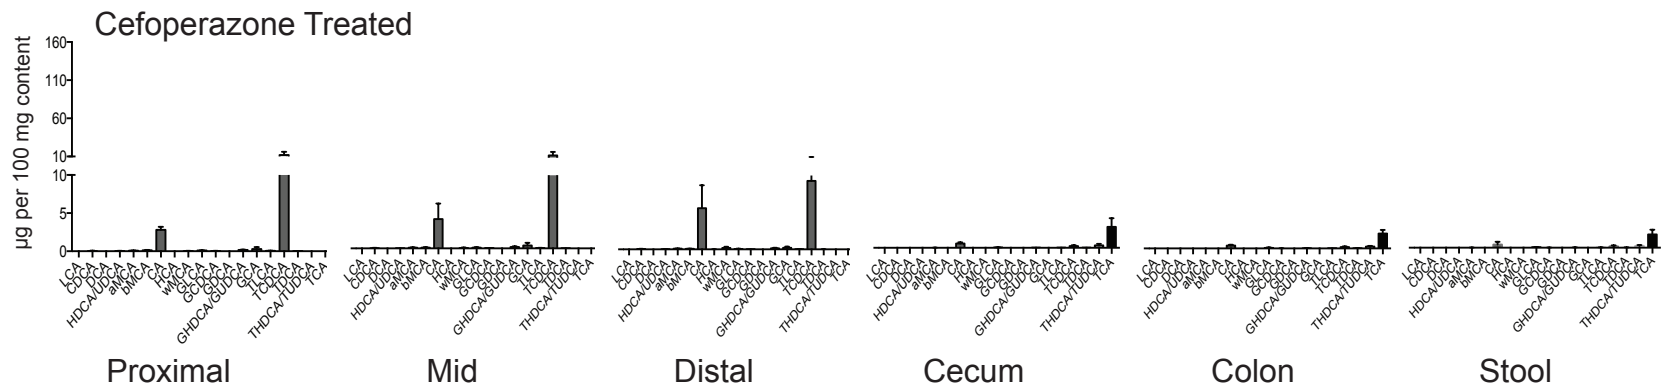

Supplement: IAI.02768-14_zii999091099so3.pdf [file IAI.02768-14_zii999091099so3.pdf]

**A**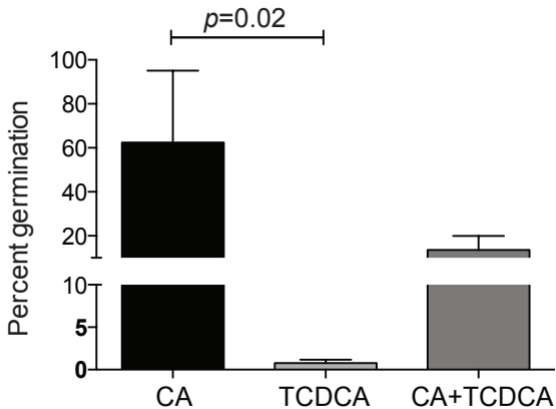

Supplement: IAI.02768-14_zii999091099so4.pdf [file IAI.02768-14_zii999091099so4.pdf]
